# Supplementary material for: Teachers’ Professional Action Competence in Education for Sustainable Development: A Systematic Review from the Perspective of Physical Education
Source: MDPI journal article supplement (doi:10.3390/su132313343), 2021-12-02
Supplement: s1 [file s1]

Archive with 1 entries (1 files):
- sustainability-1473824-supplementary.pdf
